# Supplementary material for: Opinión pública y defensa en Centroamérica y México
Source: Royal Society of Chemistry journal article supplement (doi:10.1039/c5cp06489a), 2006-01-01
Supplement: c5cp06489a1.pdf [file c5cp06489a1.pdf]

## SUPPORTING INFORMATION

### **The Effect of Fluorophore Incorporation Method on Fluorescence Enhancement in Colloidal Photonic Crystals**

Ehsan Eftekhari\*, Ivan S. Cole\*\* and Qin Li\*

\*Queensland Micro- and Nanotechnology Centre, and Environmental Engineering, Griffith  
University, Nathan Campus, QLD 4111, Australia, [qin.li@griffith.edu.au](mailto:qin.li@griffith.edu.au)

\*\*CSIRO Materials Science and Engineering, Clayton, VIC 3168, Australia

Email addresses: Ehsan Eftekhari: [ehsan.eftekhari@griffithuni.edu.au](mailto:ehsan.eftekhari@griffithuni.edu.au); Ivan S. Cole:

[Ivan.Cole@csiro.au](mailto:Ivan.Cole@csiro.au);

\*Corresponding Author: [qin.li@griffith.edu.au](mailto:qin.li@griffith.edu.au)

Address: Queensland Micro- and Nanotechnology Centre & School of Engineering, Griffith  
University, Nathan, QLD 4111, Australia

Telephone: (61)(07)37357514

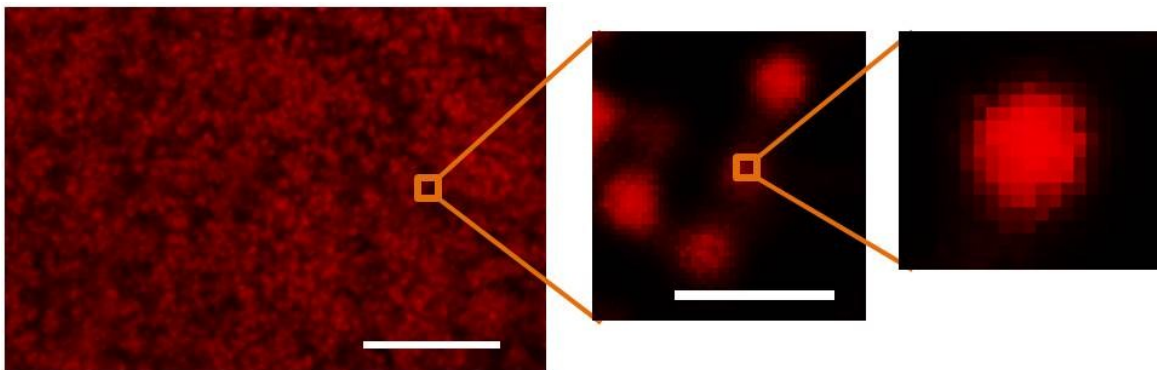

Figure S2. Confocal microscope image of RhB@large spheres. The scale bars in the left and middle images are 10  $\mu\text{m}$  and 1  $\mu\text{m}$ , respectively.

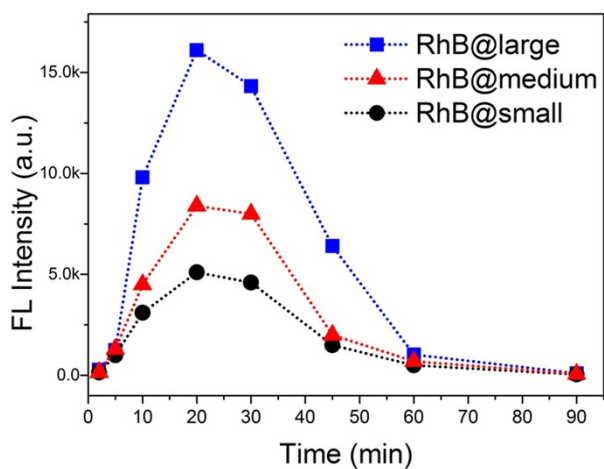

Figure S2. The effect of DMF treatment time on fluorescence intensities of RhB@small, RhB@medium and RhB@large

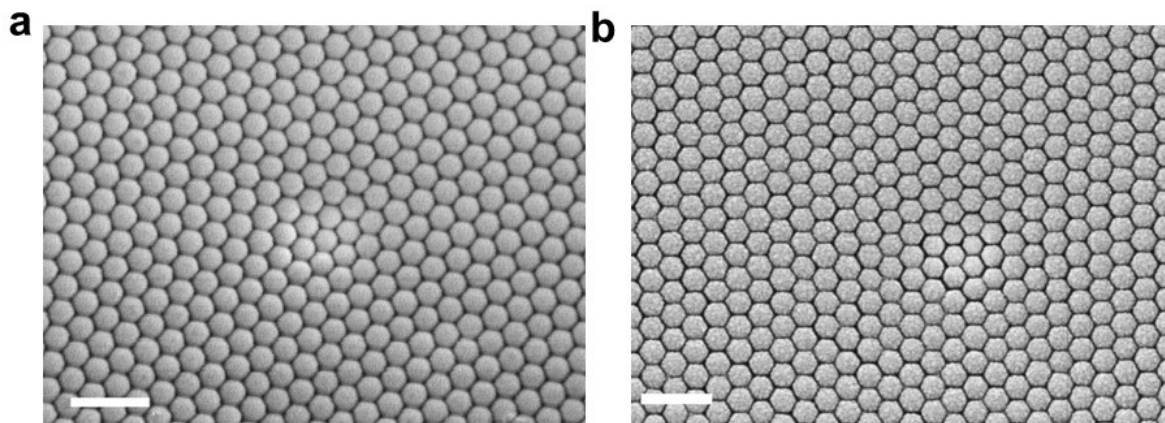

Figure S3. (a) Top view SEM images of: RhB@small film. (b) Top view SEM images of RhB@medium film. Scale bar is 1  $\mu\text{m}$

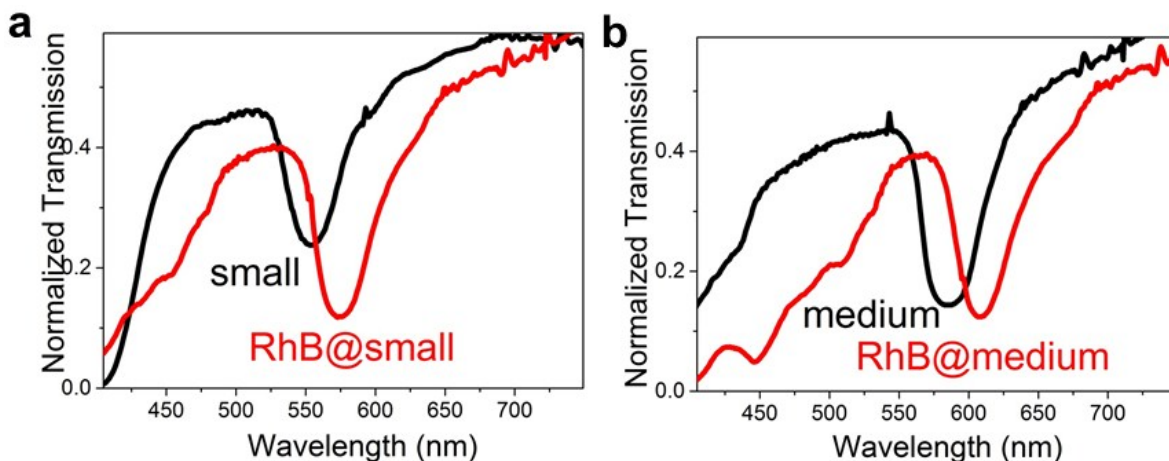

Figure S4. (a) Normalised UV-vis transmission of small PS spheres film (black) and after immobilisation of with RhB, RhB@small film (red). (b) Normalised UV-vis transmission of medium PS spheres film (black) and after immobilisation of with RhB, RhB@medium film (red).

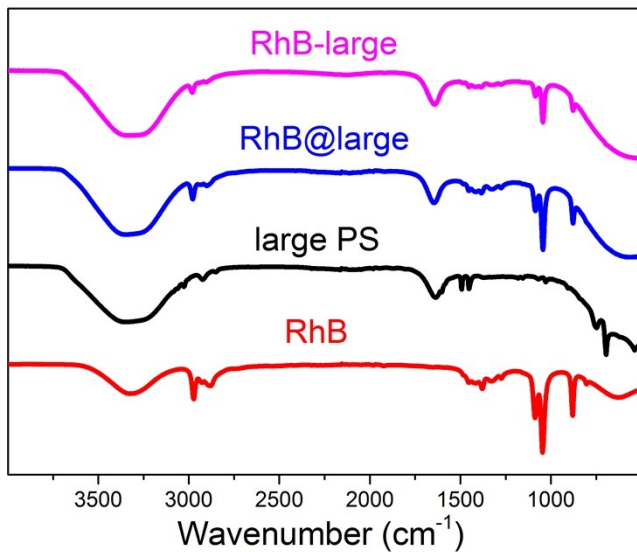

Figure S5. FTIR spectra of RhB, large PS, RhB@large and RhB-large suspensions.
